# Supplementary material
Source: Atypon-hosted journal article supplement (doi:10.1287/ijoc.2024.0893)

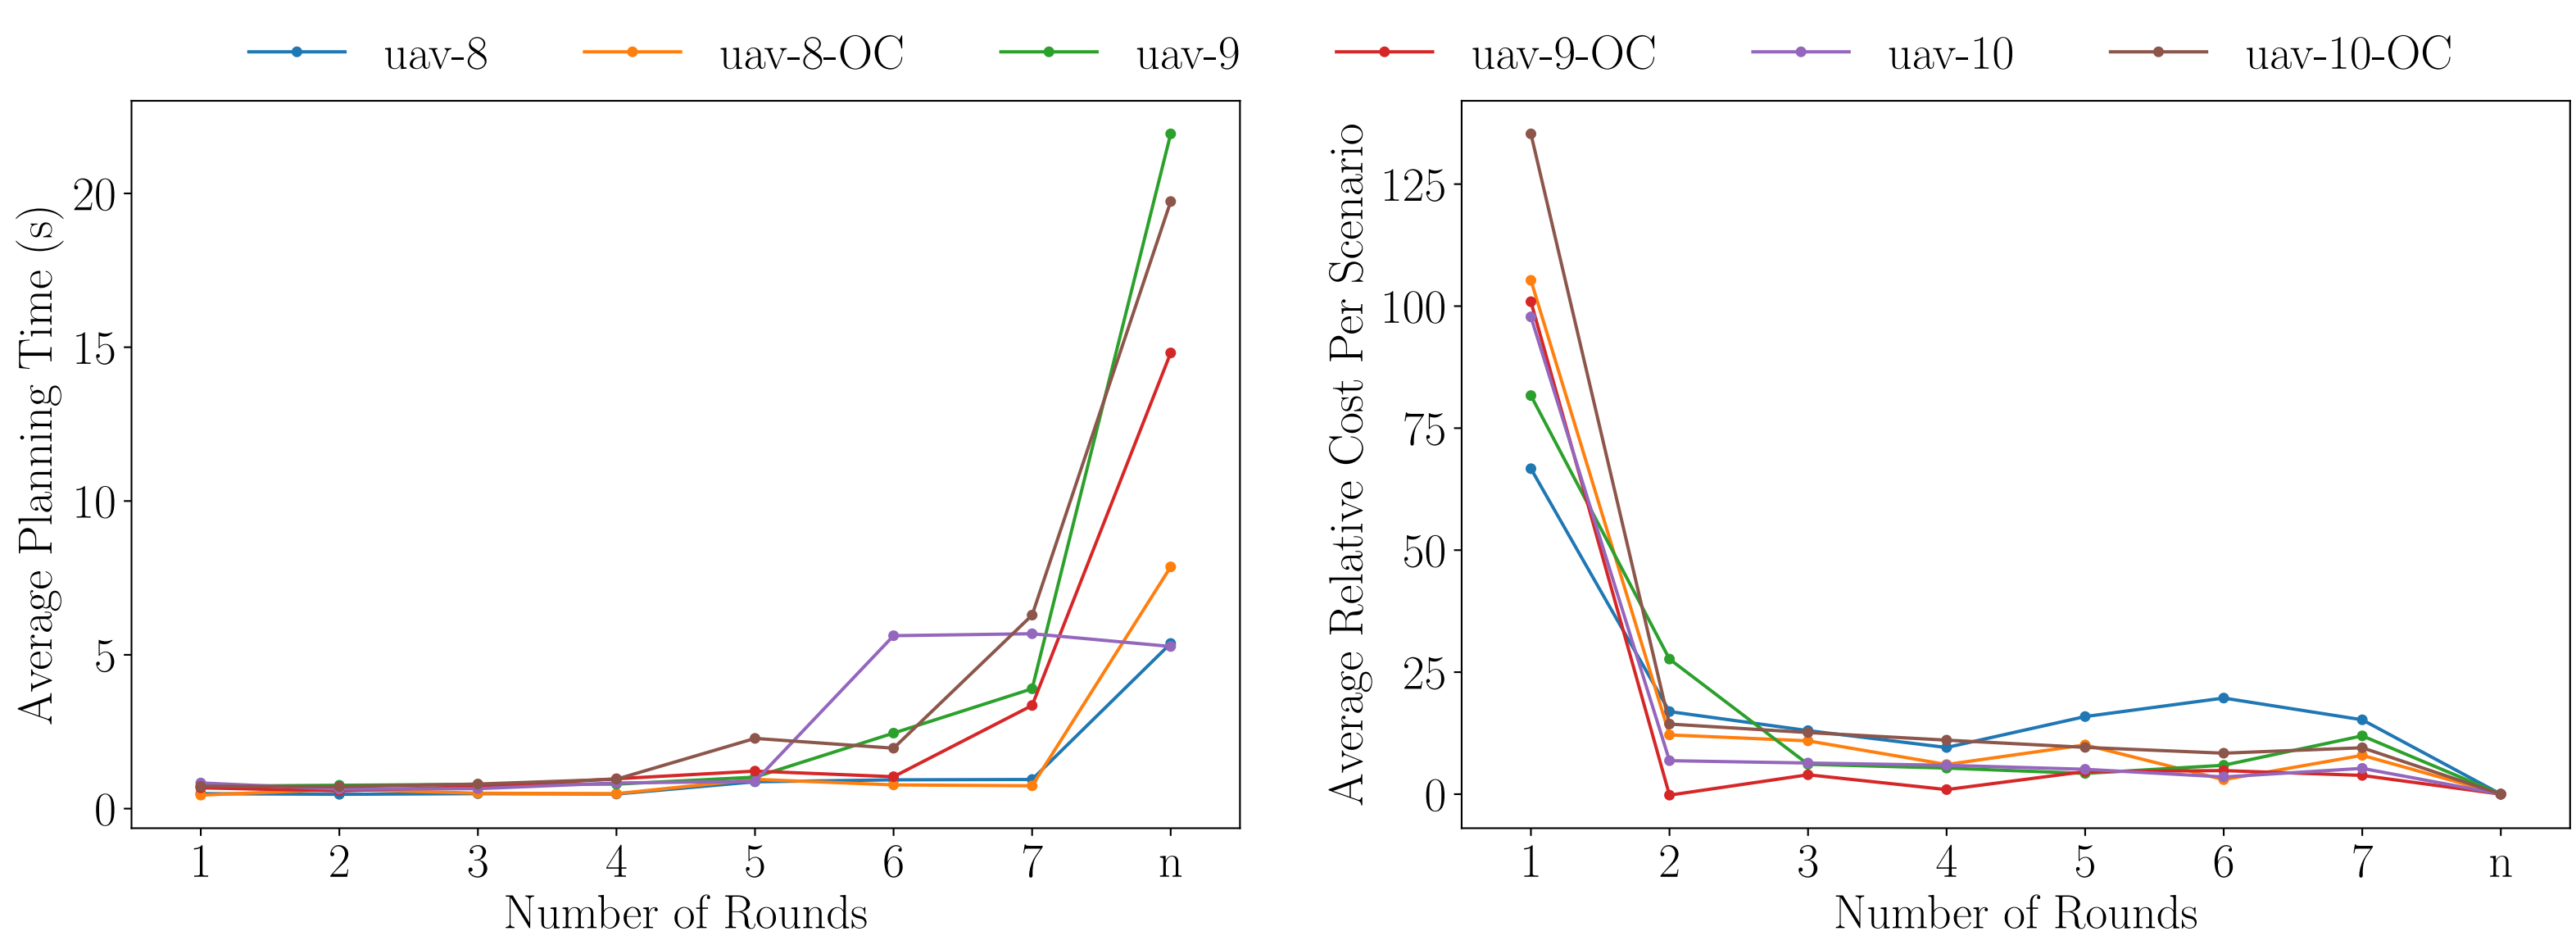

Supplement: ijoc.2024.0893.cd.zip [file uav_informs.pdf › 2024.0893-main/results/uav_informs.pdf]
